# Supplementary material for: Changes in the pattern of plasma extracellular vesicles after severe trauma
Source: PubMed Central journal article supplement (PMC5570308; doi:10.1371/journal.pone.0183640), 2017-08-24
Supplement: pone.0183640.s002.pdf [file pone.0183640.s002.pdf]

## Flow Cytometry

### Total particle count/ml

| Controls | SIRS      | Day 1    | Day3     | Day5-7   | Day9-11  | Day28    |
|----------|-----------|----------|----------|----------|----------|----------|
| 1.96E+06 | SIR085    | 4.51E+05 | 6.31E+05 |          | 5.46E+05 |          |
| 2.37E+05 | SIR086    | 1.45E+06 | 1.86E+06 |          | 2.17E+07 | 5.88E+06 |
| 7.38E+05 | SIR091    | 7.82E+06 | 1.04E+07 |          | 3.92E+06 | 2.78E+07 |
| 2.55E+05 | SIR092    | 1.87E+06 | 4.53E+06 | 6.62E+06 | 2.08E+06 | 5.56E+07 |
| 4.24E+05 | SIR095    | 1.46E+07 | 2.23E+07 | 1.51E+07 | 1.89E+08 | 7.92E+06 |
| 8.33E+05 | SIR096    | 1.41E+07 | 5.01E+07 | 7.48E+05 | 7.42E+07 |          |
| 1.35E+06 | SIR098    | 5.48E+07 | 1.95E+07 |          | 7.38E+05 |          |
| 3.12E+06 | SIR099    | 1.25E+06 | 1.49E+07 |          | 1.77E+06 | 5.60E+06 |
|          | SIR100    | 1.64E+06 | 7.16E+06 |          | 2.63E+06 | 4.64E+06 |
|          | SIR093    | 9.50E+05 | 2.31E+05 |          | 5.82E+05 | 1.10E+06 |
|          | SIRens025 | 8.28E+05 |          | 1.47E+06 |          | 2.33E+06 |
|          | SIRens022 | 1.03E+06 | 1.95E+06 | 4.56E+06 | 1.90E+07 | 1.90E+07 |
|          | SIRens029 | 1.37E+06 | 1.82E+06 | 1.96E+06 | 2.71E+06 |          |
|          | SIRens026 | 2.94E+06 | 3.19E+05 | 2.64E+05 | 1.62E+05 | 2.95E+05 |
|          | SIRens030 | 3.62E+06 | 5.07E+06 | 2.76E+06 | 3.09E+05 | 3.74E+05 |
|          | SIRens031 | 4.20E+05 | 5.89E+05 |          |          | 8.01E+05 |
|          | SIRens024 | 2.98E+05 | 2.96E+05 | 4.25E+05 |          |          |

**Flow Cytometry-Particle count/ml****CD41 positive**

| Controls | SIRS      | Day 1    | Day3     | Day5-7   | Day9-11  | Day28    |
|----------|-----------|----------|----------|----------|----------|----------|
| 6.44E+04 | SIR086    | 1.53E+05 | 4.00E+05 |          |          | 7.08E+05 |
| 1.25E+05 | SIR091    | 9.90E+04 | 2.30E+05 |          |          |          |
| 6.38E+04 | SIR092    | 3.56E+05 | 6.01E+05 |          | 2.31E+05 |          |
| 2.18E+04 | SIR095    | 2.02E+05 | 1.41E+05 |          |          | 2.30E+05 |
| 1.33E+04 | SIR096    | 3.64E+05 |          | 1.03E+06 |          |          |
| 4.21E+04 | SIR098    | 3.38E+05 | 1.80E+05 | 3.58E+05 | 2.28E+05 |          |
| 7.88E+04 | SIR099    | 2.19E+05 | 3.83E+05 |          | 3.63E+05 | 3.34E+05 |
| 6.76E+04 | SIR100    | 6.43E+05 | 4.50E+05 |          | 2.65E+05 | 2.26E+05 |
| 7.10E+04 | SIR093    | 1.94E+05 | 2.21E+05 |          | 2.16E+05 | 3.12E+05 |
| 5.89E+04 | SIRens025 | 2.53E+05 | 1.89E+05 |          |          | 4.43E+05 |
| 9.14E+04 | SIRens022 | 6.68E+05 |          | 7.42E+05 |          |          |
|          | SIRens026 | 2.78E+05 | 2.64E+05 | 2.55E+05 | 2.29E+05 |          |
|          | SIRens030 | 2.27E+05 | 2.75E+05 | 2.51E+05 |          |          |
|          | SIRens024 | 1.83E+05 | 6.13E+04 | 2.71E+05 | 1.64E+05 | 2.04E+05 |
|          | SIRens031 | 1.17E+06 |          | 1.66E+05 |          | 4.49E+05 |
|          | SIRens029 | 2.91E+05 | 2.55E+05 |          |          |          |

**Flow Cytometry-Particle count/ml****CD42 positive**

| Controls | SIRS      | Day 1    | Day3     | Day5-7   | Day9-11  | Day28    |
|----------|-----------|----------|----------|----------|----------|----------|
| 1.38E+06 | SIR086    | 5.15E+04 | 5.67E+04 |          |          | 1.01E+06 |
| 1.21E+05 | SIR091    | 1.73E+05 | 2.66E+05 |          |          | 1.02E+06 |
| 3.57E+04 | SIR092    | 2.10E+05 | 8.75E+05 |          | 2.05E+05 |          |
| 1.28E+05 | SIR095    | 4.48E+04 | 1.63E+05 |          |          | 3.67E+06 |
| 9.61E+04 | SIR096    | 3.14E+05 |          | 5.15E+05 |          |          |
| 5.56E+04 | SIR098    | 1.14E+05 | 1.73E+05 | 8.43E+04 | 2.28E+05 |          |
| 1.12E+04 | SIR099    | 1.73E+05 | 1.29E+06 |          | 5.05E+05 | 1.56E+06 |
| 6.10E+04 | SIR100    | 2.46E+05 | 1.07E+06 |          | 9.52E+04 | 1.31E+05 |
| 8.30E+04 | SIR093    | 1.34E+05 | 2.62E+05 |          | 1.11E+05 | 3.74E+05 |
| 5.15E+04 | SIRens025 | 1.13E+05 | 4.61E+04 |          |          | 7.67E+05 |
| 1.14E+04 | SIRens022 | 2.13E+05 |          | 1.25E+06 |          |          |
|          | SIRens026 | 7.93E+04 | 8.48E+04 | 8.64E+04 | 6.26E+04 |          |
|          | SIRens030 | 6.62E+04 | 7.71E+04 | 6.31E+04 |          |          |
|          | SIRens024 | 3.62E+05 | 2.06E+05 | 2.00E+05 | 9.91E+04 | 9.61E+04 |
|          | SIRens031 | 4.88E+05 |          | 9.39E+04 |          | 1.21E+06 |
|          | SIRens029 | 1.04E+05 | 1.30E+05 |          |          |          |

**Flow Cytometry-Particle count/ml  
CD144 positive**

| Controls | SIRS      | Day 1    | Day3     | Day5-7   | Day9-11  | Day28    |
|----------|-----------|----------|----------|----------|----------|----------|
| 1.01E+06 | SIR085    | 3.15E+05 | 3.75E+05 |          | 6.48E+05 |          |
| 1.58E+05 | SIR086    | 1.18E+06 | 1.36E+06 |          | 1.88E+07 |          |
| 1.68E+05 | SIR091    | 4.47E+06 |          |          | 2.09E+06 | 6.90E+06 |
| 1.84E+05 | SIR092    | 2.05E+05 | 1.06E+06 | 3.76E+05 |          | 1.06E+06 |
| 1.17E+05 | SIR095    | 1.11E+07 | 9.39E+06 |          |          |          |
| 1.40E+05 | SIR096    | 9.25E+06 | 9.13E+04 |          | 2.68E+07 |          |
| 6.75E+04 | SIR098    | 4.08E+07 |          |          |          |          |
| 1.79E+05 | SIR099    | 5.99E+05 | 3.77E+05 |          | 1.01E+06 | 9.06E+06 |
|          | SIR100    | 1.95E+06 | 1.67E+07 |          | 2.72E+06 | 2.90E+06 |
|          | SIR093    |          |          |          |          |          |
|          | SIRens025 | 3.71E+05 |          | 2.05E+05 |          | 1.61E+06 |
|          | SIRens022 | 5.96E+05 | 5.85E+05 | 1.26E+06 |          | 5.04E+06 |
|          | SIRens026 | 1.02E+06 | 1.70E+06 | 1.76E+06 |          |          |
|          | SIRens030 | 5.30E+06 | 1.64E+05 | 5.68E+04 | 7.00E+04 |          |
|          | SIRens024 | 2.53E+06 | 2.53E+06 | 2.08E+06 |          |          |
|          | SIRens031 | 4.77E+04 |          |          | 7.77E+04 | 6.57E+04 |

**Flow Cytometry-Particle count/ml  
CD45 positive**

| Controls | SIRS      | Day 1    | Day3     | Day5-7   | Day9-11  | Day28    |
|----------|-----------|----------|----------|----------|----------|----------|
| 3.76E+03 | SIR085    | 1.73E+04 | 6.77E+03 |          | 3.61E+03 |          |
| 1.05E+03 | SIR086    | 6.43E+03 | 1.73E+04 |          | 1.49E+06 |          |
| 2.37E+03 | SIR091    | 1.31E+05 |          |          | 1.53E+05 | 1.97E+06 |
| 9.11E+03 | SIR092    | 3.52E+04 | 4.00E+04 | 2.90E+04 |          | 4.00E+04 |
| 1.13E+03 | SIR095    | 3.42E+05 | 2.20E+05 |          | 1.61E+07 |          |
| 2.32E+03 | SIR096    | 3.67E+05 | 5.42E+05 |          | 3.80E+05 |          |
| 2.57E+03 | SIR098    | 8.25E+05 |          |          |          |          |
| 1.42E+03 | SIR099    | 5.42E+03 | 1.21E+04 |          | 3.10E+04 | 2.48E+05 |
|          | SIR100    | 9.64E+04 | 3.29E+05 |          | 1.10E+05 | 7.48E+06 |
|          | SIRens025 | 1.98E+03 |          | 1.52E+03 |          | 4.08E+04 |
|          | SIRens022 | 6.23E+05 | 1.15E+05 | 1.25E+05 | 7.43E+05 | 7.43E+05 |
|          | SIRens026 | 1.65E+04 | 2.93E+04 | 3.63E+04 | 1.26E+05 |          |
|          | SIRens030 | 3.04E+05 | 3.49E+03 | 2.71E+03 | 1.53E+03 |          |
|          | SIRens024 |          | 3.16E+04 |          |          |          |
|          | SIRens031 | 2.08E+04 |          |          | 1.29E+04 | 8.82E+03 |

|           | PBMC Adhesion to unstimulated EC -<br>Relative to control |        |         |       | PBMC Adhesion to TNF-treated EC -<br>relative to control |        |         |       |
|-----------|-----------------------------------------------------------|--------|---------|-------|----------------------------------------------------------|--------|---------|-------|
|           | Day1                                                      | Day3-5 | Day9-11 | Day28 | Day1                                                     | Day3-5 | Day9-11 | Day28 |
| SIR093    | 0.902                                                     | 1.083  | 1.568   | 1.516 | 0.902                                                    | 1.083  | 1.568   | 1.516 |
| SIR100    | 4.722                                                     | 3.292  | 3.333   | 7.208 | 2.036                                                    | 1.185  | 1.695   | 0.913 |
| SIR092    | 2.374                                                     | 1.077  | 0.692   | 0.862 | 0.995                                                    | 1.355  | 2.123   | 2.497 |
| SIR099    | 0.864                                                     | 1.335  | 0.407   | 1.653 | 2.411                                                    | 0.760  | 1.661   | 1.136 |
| SIRens029 | 0.909                                                     | 1.195  |         | 1.039 | 0.574                                                    | 0.766  | 0.894   | 0.620 |
| SIRens031 | 1.200                                                     | 1.000  | 0.960   | 0.900 | 0.711                                                    | 1.219  | 0.810   | 1.057 |
| SIRens022 | 6.000                                                     | 9.917  | 4.667   | 7.500 |                                                          |        | 1.182   |       |
| SIRens028 | 0.062                                                     |        | 0.375   |       | 1.403                                                    | 1.973  | 1.684   |       |
| SIR086    | 3.176                                                     | 2.353  | 4.529   |       | 1.267                                                    | 0.935  | 1.111   |       |
| SIRens030 | 0.615                                                     | 0.176  | 0.879   |       | 0.900                                                    | 0.932  | 1.251   |       |
| SIR091    | 1.438                                                     | 1.630  | 1.215   |       | 1.187                                                    | 1.013  | 0.949   |       |
| SIR098    | 1.000                                                     | 1.550  |         |       | 0.645                                                    | 0.436  |         |       |
| SIR095    | 1.091                                                     | 0.606  |         | 0.364 | 1.425                                                    | 0.883  |         | 1.369 |
| SIR094    | 0.681                                                     | 0.731  |         |       | 0.783                                                    | 0.999  | 0.899   |       |
| SIRens024 | 0.762                                                     | 1.349  | 1.381   |       | 2.250                                                    | 1.639  |         |       |
| SIRens026 | 0.278                                                     | 0.694  | 0.278   |       | 1.109                                                    | 1.375  | 1.000   |       |
| Control   |                                                           |        |         |       | 0.944                                                    | 1.230  | 1.771   |       |

**Neutrophil Adhesion to unstimulated EC -  
Relative to control**

**Neutrophil Adhesion to TNF-treated EC -  
relative to control**

|        | Day1  | Day3-5 | Day9-11 | Day28 |
|--------|-------|--------|---------|-------|
| SIR093 | 4.286 | 1.500  | 1.833   | 3.000 |
| SIR100 | 1.204 | 1.139  | 1.898   | 1.889 |
| SIR092 | 0.746 | 1.083  | 0.417   | 0.833 |
| SIR099 | 0.218 | 0.143  | 0.303   | 1.795 |

|  | Day1  | Day3-5 | Day9-11 | Day28 |
|--|-------|--------|---------|-------|
|  | 0.887 | 0.865  | 0.816   | 0.820 |
|  | 2.325 | 0.628  | 2.000   | 1.944 |
|  |       | 2.222  | 2.014   | 1.479 |
|  | 1.385 |        | 1.577   | 1.631 |



**Flow Cytometry-Particle count/ml**

| CD42     | CD41     |
|----------|----------|
| 9.61E+04 | 1.33E+04 |
| 1.28E+05 | 2.18E+04 |
| 5.56E+04 | 4.21E+04 |
| 5.15E+04 | 5.89E+04 |
| 2.06E+05 | 6.13E+04 |
| 3.57E+04 | 6.38E+04 |
| 1.38E+06 | 6.44E+04 |
| 6.10E+04 | 6.76E+04 |
| 8.30E+04 | 7.10E+04 |
| 1.12E+04 | 7.88E+04 |
| 1.14E+04 | 9.14E+04 |
| 1.73E+05 | 9.90E+04 |
| 1.21E+05 | 1.25E+05 |
| 1.63E+05 | 1.41E+05 |
| 5.15E+04 | 1.53E+05 |
| 9.91E+04 | 1.64E+05 |
| 9.39E+04 | 1.66E+05 |
| 1.73E+05 | 1.80E+05 |
| 3.62E+05 | 1.83E+05 |
| 4.61E+04 | 1.89E+05 |
| 1.34E+05 | 1.94E+05 |
| 4.48E+04 | 2.02E+05 |
| 9.61E+04 | 2.04E+05 |
| 1.11E+05 | 2.16E+05 |
| 1.73E+05 | 2.19E+05 |
| 2.62E+05 | 2.21E+05 |
| 1.31E+05 | 2.26E+05 |
| 6.62E+04 | 2.27E+05 |
| 2.28E+05 | 2.28E+05 |
| 6.26E+04 | 2.29E+05 |

**Correlation CD42 vs. CD41 positive**

| CD42     | CD41     |
|----------|----------|
| 2.66E+05 | 2.30E+05 |
| 2.05E+05 | 2.31E+05 |
| 6.31E+04 | 2.51E+05 |
| 1.13E+05 | 2.53E+05 |
| 1.30E+05 | 2.55E+05 |
| 8.64E+04 | 2.55E+05 |
| 8.48E+04 | 2.64E+05 |
| 9.52E+04 | 2.65E+05 |
| 2.00E+05 | 2.71E+05 |
| 7.71E+04 | 2.75E+05 |
| 7.93E+04 | 2.78E+05 |
| 1.04E+05 | 2.91E+05 |
| 3.74E+05 | 3.12E+05 |
| 1.56E+06 | 3.34E+05 |
| 1.14E+05 | 3.38E+05 |
| 2.10E+05 | 3.56E+05 |
| 8.43E+04 | 3.58E+05 |
| 5.05E+05 | 3.63E+05 |
| 3.14E+05 | 3.64E+05 |
| 1.29E+06 | 3.83E+05 |
| 5.67E+04 | 4.00E+05 |
| 7.67E+05 | 4.43E+05 |
| 1.21E+06 | 4.49E+05 |
| 1.07E+06 | 4.50E+05 |
| 8.75E+05 | 6.01E+05 |
| 2.46E+05 | 6.43E+05 |
| 2.13E+05 | 6.68E+05 |
| 1.01E+06 | 7.08E+05 |
| 1.25E+06 | 7.42E+05 |
| 5.15E+05 | 1.03E+06 |
| 4.88E+05 | 1.17E+06 |
